# Supplementary material
Source: PubMed Central journal article supplement (PMC2675940)
Supplement: NIHMS86683-supplement-1_si_001.pdf [file NIHMS86683-supplement-1_si_001.pdf]

## Supporting Information.

### Title: The Importance of Micelle-Bound States for the Bioactivities of Bifunctional Peptide Derivatives for $\delta/\mu$ Opioid Receptor Agonists and Neurokinin 1 Receptor Antagonists

Authors: Takashi Yamamoto,<sup>†</sup> Padma Nair,<sup>†</sup> Neil E. Jacobsen,<sup>†</sup> Peg Davis,<sup>‡</sup> Shou-wu Ma,<sup>‡</sup> Edita Navratilova,<sup>‡</sup> Sharif Moye,<sup>‡</sup> Josephine Lai,<sup>‡</sup> Henry I. Yamamura,<sup>‡</sup> Todd W. Vanderah,<sup>‡</sup> Frank Porreca,<sup>‡</sup> and Victor J. Hruby<sup>†\*</sup>

*Departments of Chemistry and Pharmacology, University of Arizona, Tucson, AZ, 85721, USA*

#### \*\*\*contents\*\*\*

|                                                                                                                   |     |
|-------------------------------------------------------------------------------------------------------------------|-----|
| Table S1. Sequence and analytical data of bifunctional peptide ligands.....                                       | S2  |
| Table S2. <sup>1</sup> H Resonance Assignments for Micelle-Bound Peptides.....                                    | S3  |
| Table S3. <sup>1</sup> H Resonance Assignments of bifunctional peptides in DMSO.....                              | S4  |
| Figure S1. Effect of Radicals on TOCSY Spectra of compound <b>1</b> .....                                         | S7  |
| Figure S2. Effect of Radicals on TOCSY Spectra of compound <b>2</b> .....                                         | S8  |
| Figure S3. Effect of Radicals on TOCSY Spectra of compound <b>3</b> .....                                         | S9  |
| Figure S4. Side-chain region and HN-HN reagon of the NOESY spectrum of compounds <b>1-3</b> in DPC micelles. .... | S10 |
| Figure S5. Fingerprint region of the DQF-COSY spectrum of compounds <b>1-3</b> in DPC micelles. .                 | S10 |
| Chart S1. HPLC trace of compound <b>1</b> .....                                                                   | S11 |
| Chart S2. HPLC trace of compound <b>2</b> .....                                                                   | S12 |
| Chart S3. HPLC trace of compound <b>3</b> .....                                                                   | S13 |

**Table S1.** Sequence and analytical data of bifunctional peptide ligands

| no | Sequence                                                                                       | $m/z^a$              |           | HPLC <sup>b</sup> |                  | TLC <sup>e</sup>  |      |       |
|----|------------------------------------------------------------------------------------------------|----------------------|-----------|-------------------|------------------|-------------------|------|-------|
|    |                                                                                                | (M + H) <sup>+</sup> |           | log $k'$          |                  | (R <sub>f</sub> ) |      |       |
|    |                                                                                                | Obs. (ESI)           | Calc.     | (A) <sup>c</sup>  | (B) <sup>d</sup> | (I)               | (II) | (III) |
| 1  | H-Tyr- <i>D</i> -Ala-Gly-Phe-Met-Pro-Leu-Trp-O-3,5-Bzl(CF <sub>3</sub> ) <sub>2</sub> (TY005)  | 1210.4810            | 1210.4871 | 19.21             | 11.14            | 0.14              | 0.73 | 0.79  |
| 2  | H-Tyr- <i>D</i> -Ala-Gly-Phe-Met-Pro-Leu-Trp-NH-3,5-Bzl(CF <sub>3</sub> ) <sub>2</sub> (TY027) | 1209.3055            | 1209.5031 | 17.29             | 7.94             | 0.09              | 0.67 | 0.58  |
| 3  | H-Tyr- <i>D</i> -Ala-Gly-Phe-Met-Pro-Leu-Trp-NH-3,5-Bzl (TY025)                                | 1073.3096            | 1073.5283 | 14.14             | 4.19             | 0.14              | 0.67 | 0.55  |

<sup>a</sup> High-resolution mass spectroscopy using electrospray ionization method. <sup>b</sup> HPLC log  $k'$  = log [(peptide retention time - solvent retention time)/solvent retention time]. All the obtained final peptides showed > 98% purity (see ChartS1-S3 in this Supporting Information). <sup>c</sup> 10-90% of acetonitrile containing 0.1% TFA within 40 min and up to 95% within an additional 5 min, 1 mL/min, 230 nm, Waters NOVA-Pak C-18 column (3.9 x 150 mm, 5 μm, 60 Å). <sup>d</sup> 30-70% acetonitrile containing 0.1% TFA within 40 min and up to 95% within an additional 5 min, 1 mL/min, 230 nm, Vydac 218TP104 C-18 column (4.6 x 250 mm, 10 μm, 300 Å). <sup>e</sup> (I) CHCl<sub>3</sub> : MeOH : AcOH = 90 : 10 : 3, (II) EtOAc : *n*-BuOH : water : AcOH = 5 : 3 : 1 : 1, (III) *n*-BuOH : water : AcOH = 4 : 1 : 1.

**Table S2.** <sup>1</sup>H Resonance Assignments for Micelle-Bound Bifunctional Peptides with 40-fold DPC in 90% H<sub>2</sub>O/10% D<sub>2</sub>O, 45mM CD<sub>3</sub>CO<sub>2</sub>Na, 1mM NaN<sub>3</sub> at 310 K

| H-Tyr- <i>D</i> -Ala-Gly-Phe-Met-Pro-Leu-Trp-O-3,5-Bzl(CF <sub>3</sub> ) <sub>2</sub> TFA (1), 3.8 mM, only for the major isomer, δ: |      |            |            |                                                            |
|--------------------------------------------------------------------------------------------------------------------------------------|------|------------|------------|------------------------------------------------------------|
| AA                                                                                                                                   | NH   | α          | β          | misc.                                                      |
| Tyr <sup>1</sup>                                                                                                                     |      | 4.26       | 3.09, 3.20 | 2,6H: 7.18, 3,5H: 6.93                                     |
| <i>D</i> -Ala <sup>2</sup>                                                                                                           | 8.69 | 4.20       | 1.22       |                                                            |
| Gly <sup>3</sup>                                                                                                                     | 8.52 | 3.86, 3.96 |            |                                                            |
| Phe <sup>4</sup>                                                                                                                     | 7.89 | 4.70       | 3.15, 3.20 | 2,6H: 7.32, 3,5H: 7.35, 4H <sup>a</sup>                    |
| Met <sup>5</sup>                                                                                                                     | 8.17 | 4.69       | 1.96, 2.05 | γ: 2.45, 2.51, CH <sub>3</sub> : 2.08                      |
| Pro <sup>6</sup>                                                                                                                     |      | 4.45       | 1.59, 2.20 | γ: 1.78, 1.90, δ: 3.61, 3.71                               |
| Leu <sup>7</sup>                                                                                                                     | 7.84 | 4.44       | 1.59       | γ: 1.59, δ: 0.86                                           |
| Trp <sup>8</sup>                                                                                                                     | 8.11 | 4.73       | 3.34, 3.47 | Ind2: 7.42, Ind4: 7.52, Ind5: 7.13, Ind6: 7.00, Ind7: 7.48 |
| 3,5-Bn(CF <sub>3</sub> ) <sub>2</sub>                                                                                                |      | 5.02, 5.08 |            | 2.6H: 7.70, 4H: 7.76                                       |

| H-Tyr- <i>D</i> -Ala-Gly-Phe-Met-Pro-Leu-Trp-NH-3,5-Bzl(CF <sub>3</sub> ) <sub>2</sub> TFA (2), 3.5 mM, only for the major isomer, δ: |      |            |            |                                                            |
|---------------------------------------------------------------------------------------------------------------------------------------|------|------------|------------|------------------------------------------------------------|
| AA                                                                                                                                    | NH   | α          | β          | misc.                                                      |
| Tyr <sup>1</sup>                                                                                                                      |      | 4.28       | 3.11, 3.22 | 2,6H: 7.20, 3,5H: 6.93                                     |
| <i>D</i> -Ala <sup>2</sup>                                                                                                            | 8.71 | 4.24       | 1.22       |                                                            |
| Gly <sup>3</sup>                                                                                                                      | 8.56 | 3.86, 3.96 |            |                                                            |
| Phe <sup>4</sup>                                                                                                                      | 7.82 | 4.68       | 3.13, 3.19 | 2,6H: 7.27, 3,5H: 7.34, 4H <sup>a</sup>                    |
| Met <sup>5</sup>                                                                                                                      | 8.07 | 4.55       | 1.91       | γ: 2.40, CH <sub>3</sub> : 2.01                            |
| Pro <sup>6</sup>                                                                                                                      |      | 4.36       | 1.18, 2.01 | γ: 1.56, 1.69, δ: 3.44, 3.60                               |
| Leu <sup>7</sup>                                                                                                                      | 8.35 | 4.18       | 1.71       | γ: 1.61, δ: 0.92, 0.98                                     |
| Trp <sup>8</sup>                                                                                                                      | 7.40 | 4.67       | 3.31, 3.47 | Ind2: 7.40, Ind4: 7.37, Ind5: 6.83, Ind6: 7.10, Ind7: 7.51 |
| 3,5-Bn(CF <sub>3</sub> ) <sub>2</sub>                                                                                                 | 8.03 | 4.41, 4.52 |            | 2.6H: 7.85, 4H: 7.75                                       |

| H-Tyr- <i>D</i> -Ala-Gly-Phe-Met-Pro-Leu-Trp-NH-Bzl TFA (3), 4.0 mM, only for the major isomer, δ: |      |            |            |                                                            |
|----------------------------------------------------------------------------------------------------|------|------------|------------|------------------------------------------------------------|
| AA                                                                                                 | NH   | α          | β          | misc.                                                      |
| Tyr <sup>1</sup>                                                                                   |      | 4.20       | 3.04, 3.13 | 2,6H: 7.11, 3,5H: 6.85                                     |
| <i>D</i> -Ala <sup>2</sup>                                                                         | 8.62 | 4.17       | 1.14       |                                                            |
| Gly <sup>3</sup>                                                                                   | 8.47 | 3.78, 3.88 |            |                                                            |
| Phe <sup>4</sup>                                                                                   | 7.73 | 4.60       | 3.04, 3.11 | 2,6H: 7.19, 3,5H: 7.26, 4H <sup>a</sup>                    |
| Met <sup>5</sup>                                                                                   | 7.94 | 4.41       | 1.79       | γ: 2.31, 2.37, CH <sub>3</sub> : 2.04                      |
| Pro <sup>6</sup>                                                                                   |      | 4.23       | 0.78, 1.83 | γ: 1.23, 1.50, δ: 2.97, 3.43                               |
| Leu <sup>7</sup>                                                                                   | 8.46 | 4.05       | 1.67       | γ: 1.55, δ: 0.85, 0.93                                     |
| Trp <sup>8</sup>                                                                                   | 7.14 | 4.61       | 3.23, 3.54 | Ind2: 7.36, Ind4: 7.53, Ind5: 6.96, Ind6: 7.10, Ind7: 7.48 |
| Bzl                                                                                                | 7.42 | 4.17, 4.33 |            | 2.6H: 7.14, 3,5H: 7.09, 4H <sup>a</sup>                    |

<sup>a</sup>: not observed. Ind# represents the corresponding resonances in indole ring of Trp.

**Table S3.** <sup>1</sup>H Resonance Assignments of bifunctional peptides in DMSO at 298K.

| H-Tyr- <i>D</i> -Ala-Gly-Phe-Pro-Met-Leu-Trp-O-3,5-Bzl(CF <sub>3</sub> ) <sub>2</sub> TFA (1); |                         |                                                                 |                                                                |                                                                                                                                                                                    |
|------------------------------------------------------------------------------------------------|-------------------------|-----------------------------------------------------------------|----------------------------------------------------------------|------------------------------------------------------------------------------------------------------------------------------------------------------------------------------------|
| Only one isomer was found; <sup>1</sup> H-NMR (DMSO- <i>d</i> <sub>6</sub> ) δ:                |                         |                                                                 |                                                                |                                                                                                                                                                                    |
| AA                                                                                             | NH                      | α                                                               | β                                                              | misc.                                                                                                                                                                              |
| Tyr <sup>1</sup>                                                                               | 8.05(3H, bs)            | 3.95-4.02(1H, m)                                                | 2.80-2.91(2H, m)                                               | 6.71(2H, d, J=8.5Hz: PhH),<br>7.03(2H, d, J=9.0Hz: PhH),<br>9.33(1H, bs: PhOH)                                                                                                     |
| <i>D</i> -Ala <sup>2</sup>                                                                     | 8.52(1H, d,<br>J=6.5Hz) | 4.29-4.35(1H, m)                                                | 1.06(3H, d, J=7.0Hz)                                           | -                                                                                                                                                                                  |
| Gly <sup>3</sup>                                                                               | 8.19(1H, t,<br>J=5.0Hz) | 3.62(1H, dd, J=5.0,<br>17.0Hz), 3.68 (1H,<br>dd, J=5.5, 17.0Hz) | -                                                              | -                                                                                                                                                                                  |
| Phe <sup>4</sup>                                                                               | 7.47(1H, d,<br>J=7.5Hz) | 4.52-4.60(1H, m)                                                | 2.68-2.75(1H, m),<br>2.88-2.98(1H, m)                          | 7.13-7.28(5H, m: PhH)                                                                                                                                                              |
| Met <sup>5</sup>                                                                               | 8.41(1H, d,<br>J=8.0Hz) | 4.62(1H, d,<br>J=7.5Hz)                                         | 1.75-1.82(1H, m),<br>1.89-1.98(1H, m)                          | 2.42-2.52(2H, m: γCH <sub>2</sub> ), 2.02(3H, s:<br>δCH <sub>3</sub> )                                                                                                             |
| Pro <sup>5</sup>                                                                               | -                       | 4.28-4.38(1H, m)                                                | 1.67-1.75(1H, m),<br>1.88-1.98(1H, m)                          | 1.73-1.80(1H, m: γCH <sub>2</sub> ),<br>1.82-1.90(1H, m: γCH <sub>2</sub> ),<br>3.50-3.60(2H, m: δCH <sub>2</sub> )                                                                |
| Leu <sup>6</sup>                                                                               | 7.89(1H, d,<br>J=8.0Hz) | 4.28-4.33(1H, m)                                                | 1.35(2H, dd, J=7.0, 7.0Hz)                                     | 1.53-1.61(1H, m: γCH <sub>2</sub> ), 0.76(3H,<br>d, J=6.5Hz: δCH <sub>2</sub> ), 0.79(3H, d,<br>J=6.5Hz: δCH <sub>2</sub> )                                                        |
| Trp <sup>7</sup>                                                                               | 8.40(1H, d,<br>J=7.5Hz) | 4.52-4.60(1H, m)                                                | 3.13(1H, dd, J=6.5,<br>15.0Hz), 3.20(1H, dd,<br>J=5.5, 14.5Hz) | 6.96(1H, dd, J=7.0, 7.0Hz: Ind5),<br>7.05(1H, dd, J=7.0, 7.0Hz: Ind6),<br>7.17(1H, s: Ind2), 7.32(1H, d,<br>J=8.0Hz: Ind4), 7.46(1H, d,<br>J=7.5Hz: Ind7), 10.88(1H, bs,<br>IndNH) |
| 3,5-<br>Bzl(CF <sub>3</sub> ) <sub>2</sub>                                                     | -                       | 5.11(1H, d,<br>J=13.5Hz:),<br>5.21(1H, d,<br>J=13.5Hz:)         | -                                                              | 7.89(2H, s: PhH), 8.04(1H, s: PhH)                                                                                                                                                 |

| H-Tyr- <i>D</i> -Ala-Gly-Phe-Pro-Met-Leu-Trp-NH-3,5-Bzl(CF <sub>3</sub> ) <sub>2</sub> TFA ( <b>2</b> ); |                         |                                                                 |                                                                |                                                                                                                                                                                    |
|----------------------------------------------------------------------------------------------------------|-------------------------|-----------------------------------------------------------------|----------------------------------------------------------------|------------------------------------------------------------------------------------------------------------------------------------------------------------------------------------|
| Only one isomer was found; <sup>1</sup> H-NMR (DMSO- <i>d</i> <sub>6</sub> ) δ:                          |                         |                                                                 |                                                                |                                                                                                                                                                                    |
| AA                                                                                                       | NH                      | α                                                               | β                                                              | misc.                                                                                                                                                                              |
| Tyr <sup>1</sup>                                                                                         | 8.04(3H, bs)            | 3.93-4.00(1H, m)                                                | 2.80-2.92(2H, m)                                               | 6.69(2H, d, J=7.2Hz: PhH),<br>7.01(2H, d, J=7.2Hz: PhH),<br>9.31(1H, bs: PhOH)                                                                                                     |
| <i>D</i> -Ala <sup>2</sup>                                                                               | 8.50(1H, d,<br>J=7.8Hz) | 4.28-4.33(1H, m)                                                | 1.04(3H, d, J=6.6Hz)                                           | -                                                                                                                                                                                  |
| Gly <sup>3</sup>                                                                                         | 8.17(1H, t,<br>J=6.0Hz) | 3.60(1H, dd, J=5.4,<br>16.8Hz), 3.69 (1H,<br>dd, J=5.4, 16.2Hz) | -                                                              | -                                                                                                                                                                                  |
| Phe <sup>4</sup>                                                                                         | 7.93-8.00(1H,<br>m)     | 4.50-4.55(1H, m)                                                | 2.72(1H, dd, J=9.6,<br>13.8Hz), 2.89-2.95(1H, m)               | 7.13-7.28(5H, m: PhH)                                                                                                                                                              |
| Met <sup>5</sup>                                                                                         | 8.38(1H, d,<br>J=7.2Hz) | 4.59(1H, dd, J=7.8,<br>14.4Hz)                                  | 1.70-1.80(1H, m),<br>1.86-1.94(1H, m)                          | 2.42-2.47 (2H, m: γCH <sub>2</sub> ), 2.02(3H,<br>s: δCH <sub>3</sub> )                                                                                                            |
| Pro <sup>5</sup>                                                                                         | -                       | 4.28-4.33(1H, m)                                                | 1.63-1.68(1H, m),<br>1.85-1.92(1H, m)                          | 1.66-1.84(2H, m: γCH <sub>2</sub> ),<br>3.50-3.60(2H, m: δCH <sub>2</sub> )                                                                                                        |
| Leu <sup>6</sup>                                                                                         | 7.95-8.02(1H,<br>m)     | 4.21(1H, dd, J=8.0,<br>15.0Hz)                                  | 1.38(2H, dd, J=7.2, 7.2Hz)                                     | 1.53-1.61(1H, m: γCH <sub>2</sub> ), 0.76(3H,<br>d, J=6.6Hz: δCH <sub>2</sub> ), 0.82(3H, d,<br>J=6.6Hz: δCH <sub>2</sub> )                                                        |
| Trp <sup>7</sup>                                                                                         | 7.92(1H, d,<br>J=7.8Hz) | 4.50-4.55(1H, m)                                                | 3.01(1H, dd, J=7.8,<br>14.4Hz), 3.13(1H, dd,<br>J=5.4, 14.4Hz) | 6.94(1H, dd, J=7.8, 7.8Hz: Ind5),<br>7.04(1H, dd, J=8.4, 8.4Hz: Ind6),<br>7.08(1H, s: Ind2), 7.30(1H, d,<br>J=8.4Hz: Ind4), 7.51(1H, d,<br>J=7.8Hz: Ind7), 10.88(1H, bs,<br>IndNH) |
| 3,5-<br>Bzl(CF <sub>3</sub> ) <sub>2</sub>                                                               | 8.57(1H, t,<br>J=6.0Hz) | 4.32(1H, dd, J=5.4,<br>16.2Hz), 4.44(1H,<br>d, J=6.6, 15.6Hz)   | -                                                              | 7.88(2H, s: PhH), 7.94(1H, s: PhH)                                                                                                                                                 |

H-Tyr-*D*-Ala-Gly-Phe-Pro-Met-Leu-Trp-NH-Bzl TFA (□);

Only one isomer was found; <sup>1</sup>H-NMR (DMSO-*d*<sub>6</sub>) δ:

| AA                         | NH                    | α                                                        | β                                                        | misc.                                                                                                                                                     |
|----------------------------|-----------------------|----------------------------------------------------------|----------------------------------------------------------|-----------------------------------------------------------------------------------------------------------------------------------------------------------|
| Tyr <sup>1</sup>           | 8.03(3H, bs)          | 3.93-4.02(1H, m)                                         | 2.85(1H, dd, J=7.5, 14.0Hz), 2.89(1H, dd, J=7.0, 14.0Hz) | 6.70(2H, d, J=7.0Hz: PhH), 7.02(2H, d, J=8.5Hz: PhH), 9.31(1H, bs: PhOH)                                                                                  |
| <i>D</i> -Ala <sup>2</sup> | 8.55(1H, d, J=7.5Hz)  | 4.33(1H, dd, J=6.5, 6.5Hz)                               | 1.06(3H, d, J=6.0Hz)                                     | -                                                                                                                                                         |
| Gly <sup>3</sup>           | 8.19(1H, t, J=6.0Hz)  | 3.62(1H, dd, J=6.0, 17.0Hz), 3.70(1H, dd, J=6.0, 16.5Hz) | -                                                        | -                                                                                                                                                         |
| Phe <sup>4</sup>           | 7.97(1H, dd, J=7.5Hz) | 4.56(1H, dd, J=7.0, 14.0Hz)                              | 2.74(1H, dd, J=9.5, 13.5Hz), 2.95(1H, dd, J=5.5, 15.0Hz) | 7.05-7.28(5H, m)                                                                                                                                          |
| Met <sup>5</sup>           | 8.41(1H, d, J=7.5Hz)  | 4.61(1H, dd, J=7.0, 14.5Hz)                              | 1.75-1.82(1H, m), 1.89-1.97(1H, m)                       | 2.45-2.52(2H, m: γCH <sub>2</sub> ), 2.02(3H, s: δCH <sub>3</sub> )                                                                                       |
| Pro <sup>5</sup>           | -                     | 4.33(1H, dd, J=6.5, 6.5Hz)                               | 1.70-1.80(2H, m)                                         | 1.82-1.88(1H, m: γCH <sub>2</sub> ), 1.90-1.99(1H, m: γCH <sub>2</sub> ), 3.49-3.55(1H, m: δCH <sub>2</sub> ), 3.55-3.62(1H, m: δCH <sub>2</sub> )        |
| Leu <sup>6</sup>           | 8.01(1H, d, J=7.5Hz)  | 4.19-4.25(1H, m)                                         | 1.41(2H, dd, J=7.0, 7.0Hz)                               | 1.55-1.64(1H, m: γCH <sub>2</sub> ), 0.80(3H, d, J=6.5Hz: δCH <sub>2</sub> ), 0.86(3H, d, J=6.5Hz: δCH <sub>2</sub> )                                     |
| Trp <sup>7</sup>           | 7.83(1H, dd, J=8.0Hz) | 4.56(1H, dd, J=7.0, 14.0Hz)                              | 3.02(1H, dd, J=7.5, 15.0Hz), 3.15(1H, dd, J=6.0, 14.5Hz) | 6.97(1H, dd, J=7.5, 7.5Hz: Ind5), 7.03-7.08(1H, m: Ind6), 7.09(1H, s: Ind2), 7.34(1H, d, J=8.0Hz: Ind4), 7.55(1H, d, J=8.0Hz: Ind7), 10.88(1H, bs, IndNH) |
| Bzl                        | 8.33(1H, t, J=6.0Hz)  | 4.18-4.30(2H, m)                                         | -                                                        | 7.05-7.28(5H, m)                                                                                                                                          |

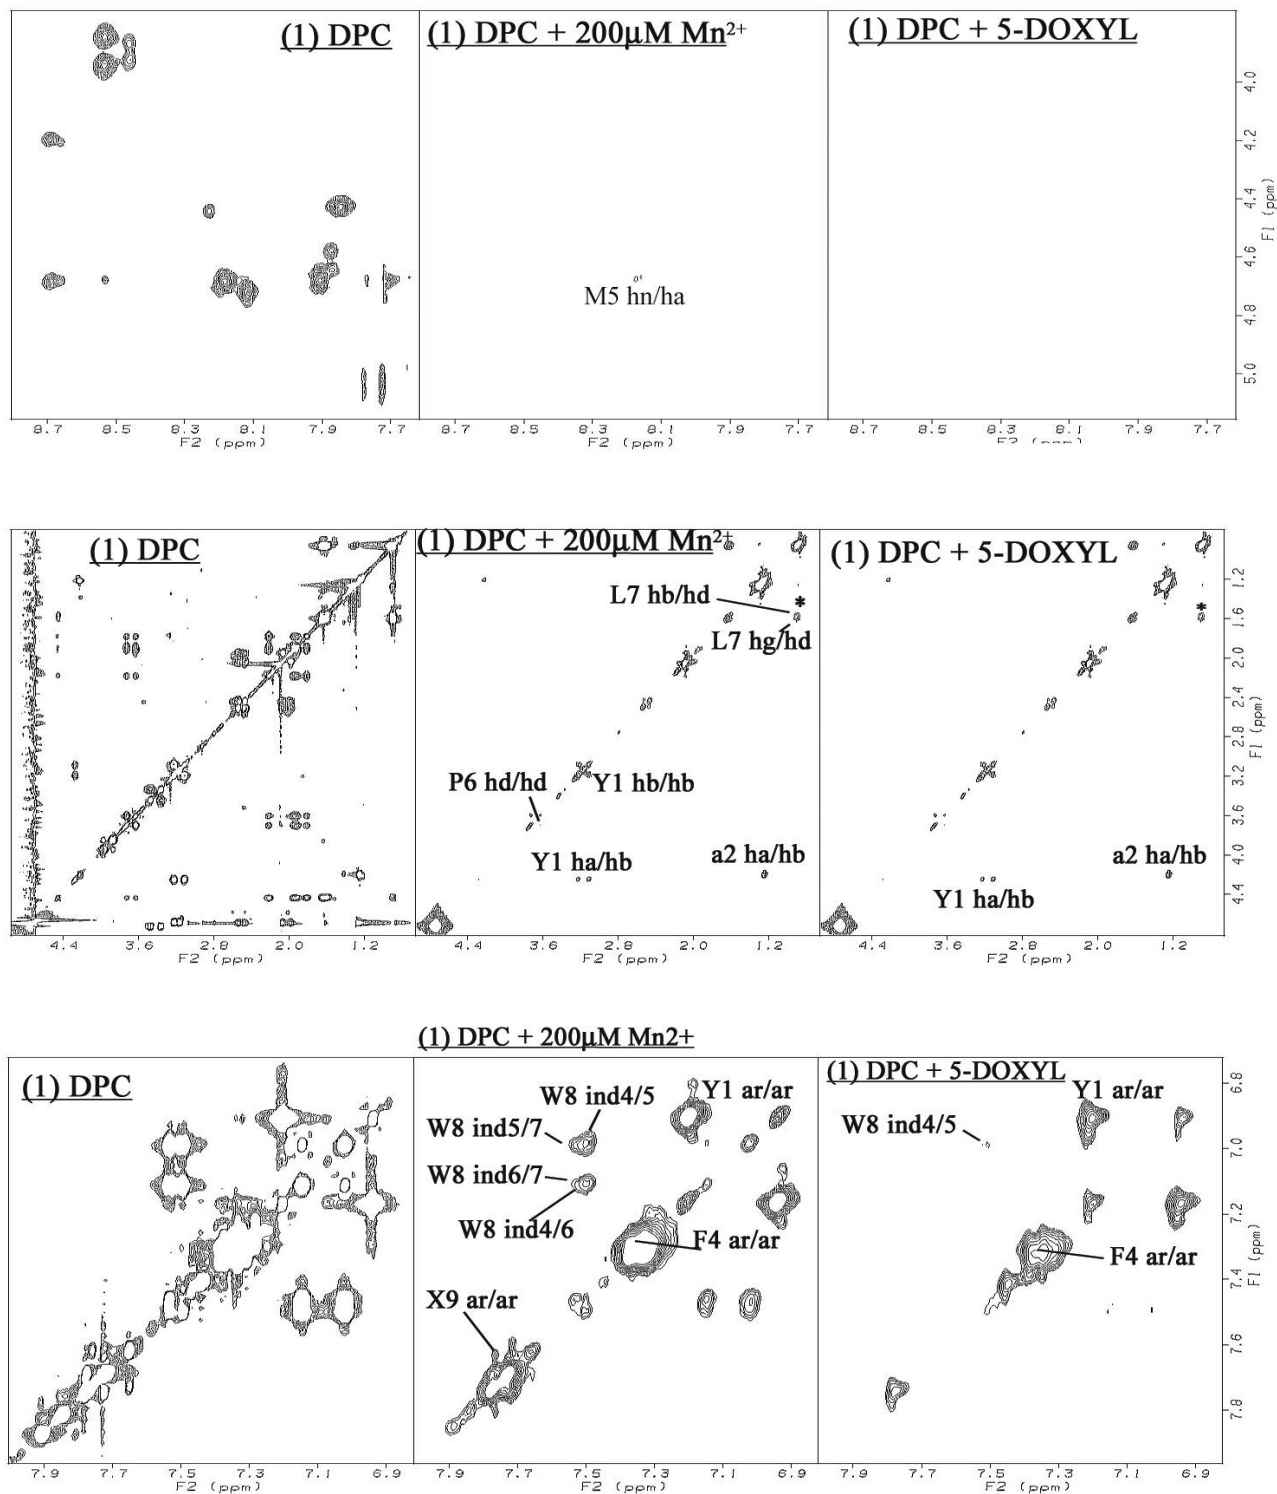

**Figure S1.** Effect of Radicals on TOCSY Spectra. **1** with DPC micelles (left column), with 200  $\mu$ M  $Mn^{2+}$  (middle) and 5-DOXYL stearic acid (right). Preserved resonances (labeled) are in a phase not missed by the phase-specific radical probe ( $Mn^{2+}$  or DOXYL). X9 represents the cross-peaks derived from the corresponding aromatic protons of benzyl moiety. The resonances with asterisk (\*) are DPC or 5-DOXYL derived ones. Spectra were compared from the same noise level.

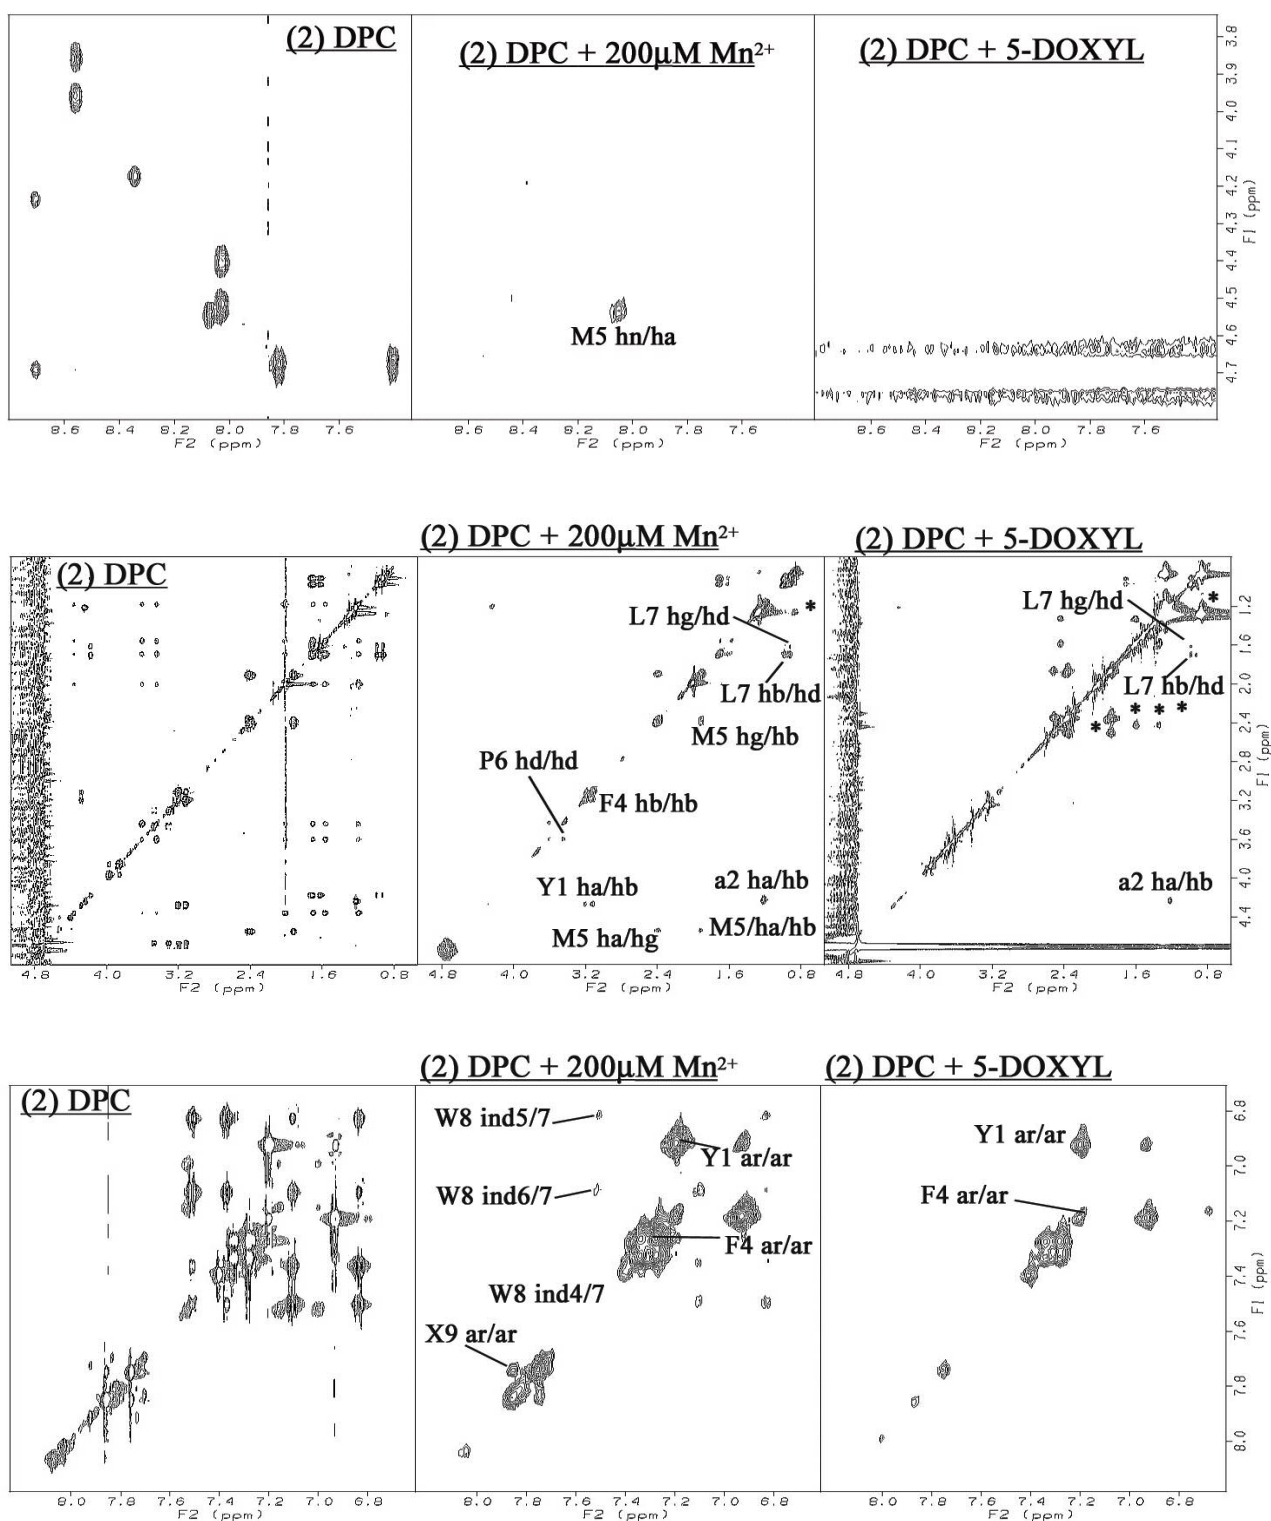

**Figure S2.** Effect of Radicals on TOCSY Spectra. **2** with DPC micelles (left column), with 200  $\mu$ M  $Mn^{2+}$  (middle) and 5-DOXYL stearic acid (right). Preserved resonances (labeled) are in a phase not be missed by the phase-specific radical probe ( $Mn^{2+}$  or DOXYL). X9 represents the cross-peaks derived from the corresponding aromatic protons of benzyl moiety. The resonances with asterisk (\*) are DPC or 5-DOXYL derived ones. Spectra were compared from the same noise level.



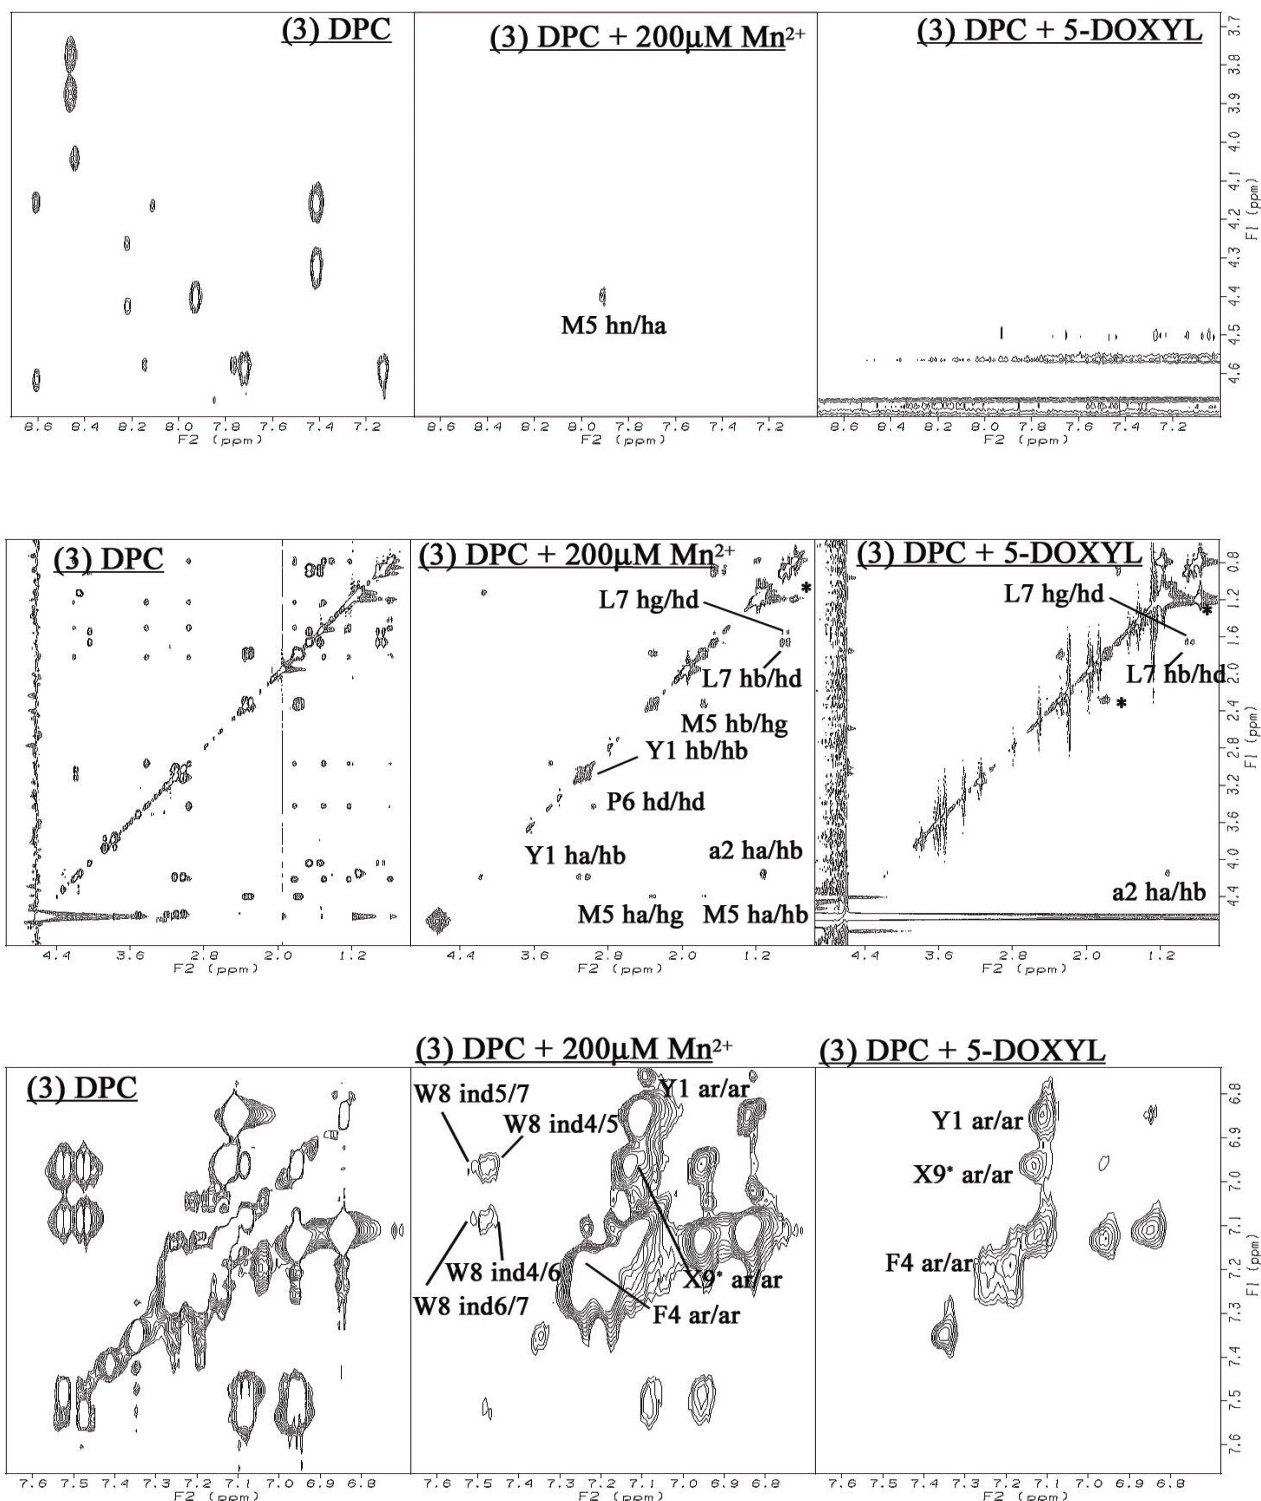

**Figure S3.** Effect of Radicals on TOCSY Spectra. **3** with DPC micelles (left column), with 200  $\mu$ M  $Mn^{2+}$  (middle) and 5-DOXYL stearic acid (right). Preserved resonances (labeled) are in a phase not be affected by the phase-specific radical probe ( $Mn^{2+}$  or DOXYL). X9 represents the cross-peaks derived from the corresponding aromatic protons of benzyl moiety. The resonances with asterisk (\*) are DPC or 5-DOXYL derived ones. Spectra were compared from the same noise level.

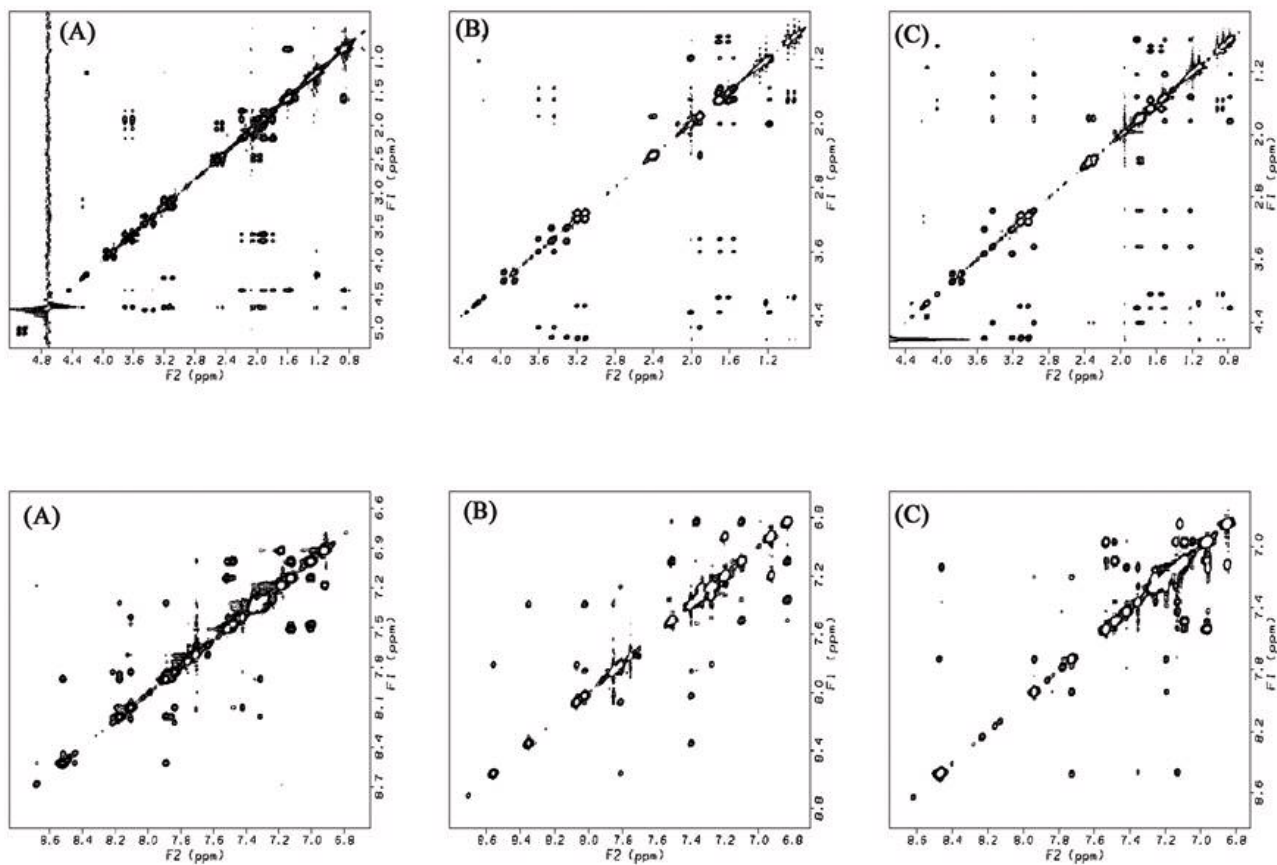

**Figure S4.** Side-chain region (upper row) and  $H^N$ - $H^N$  region (bottom) of the NOESY spectrum of (A) **1**, (B) **2** and (C) **3** in DPC micelles.

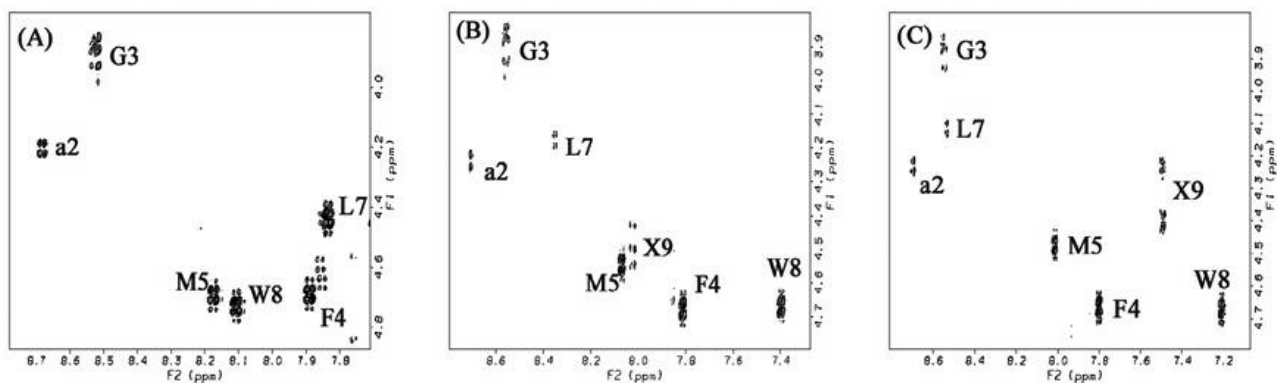

**Figure S5.** Fingerprint ( $H^N$ - $H^\alpha$ ) region of the DQF-COSY spectrum of (A) **1**, (B) **2** and (C) **3** in DPC micelles. Intraresidue  $H^N$ - $H^\alpha$  cross-peaks are labeled with residue number. X9 represents the cross-peaks derived from the corresponding  $C$ -terminal  $H^N$  and benzyl protons.

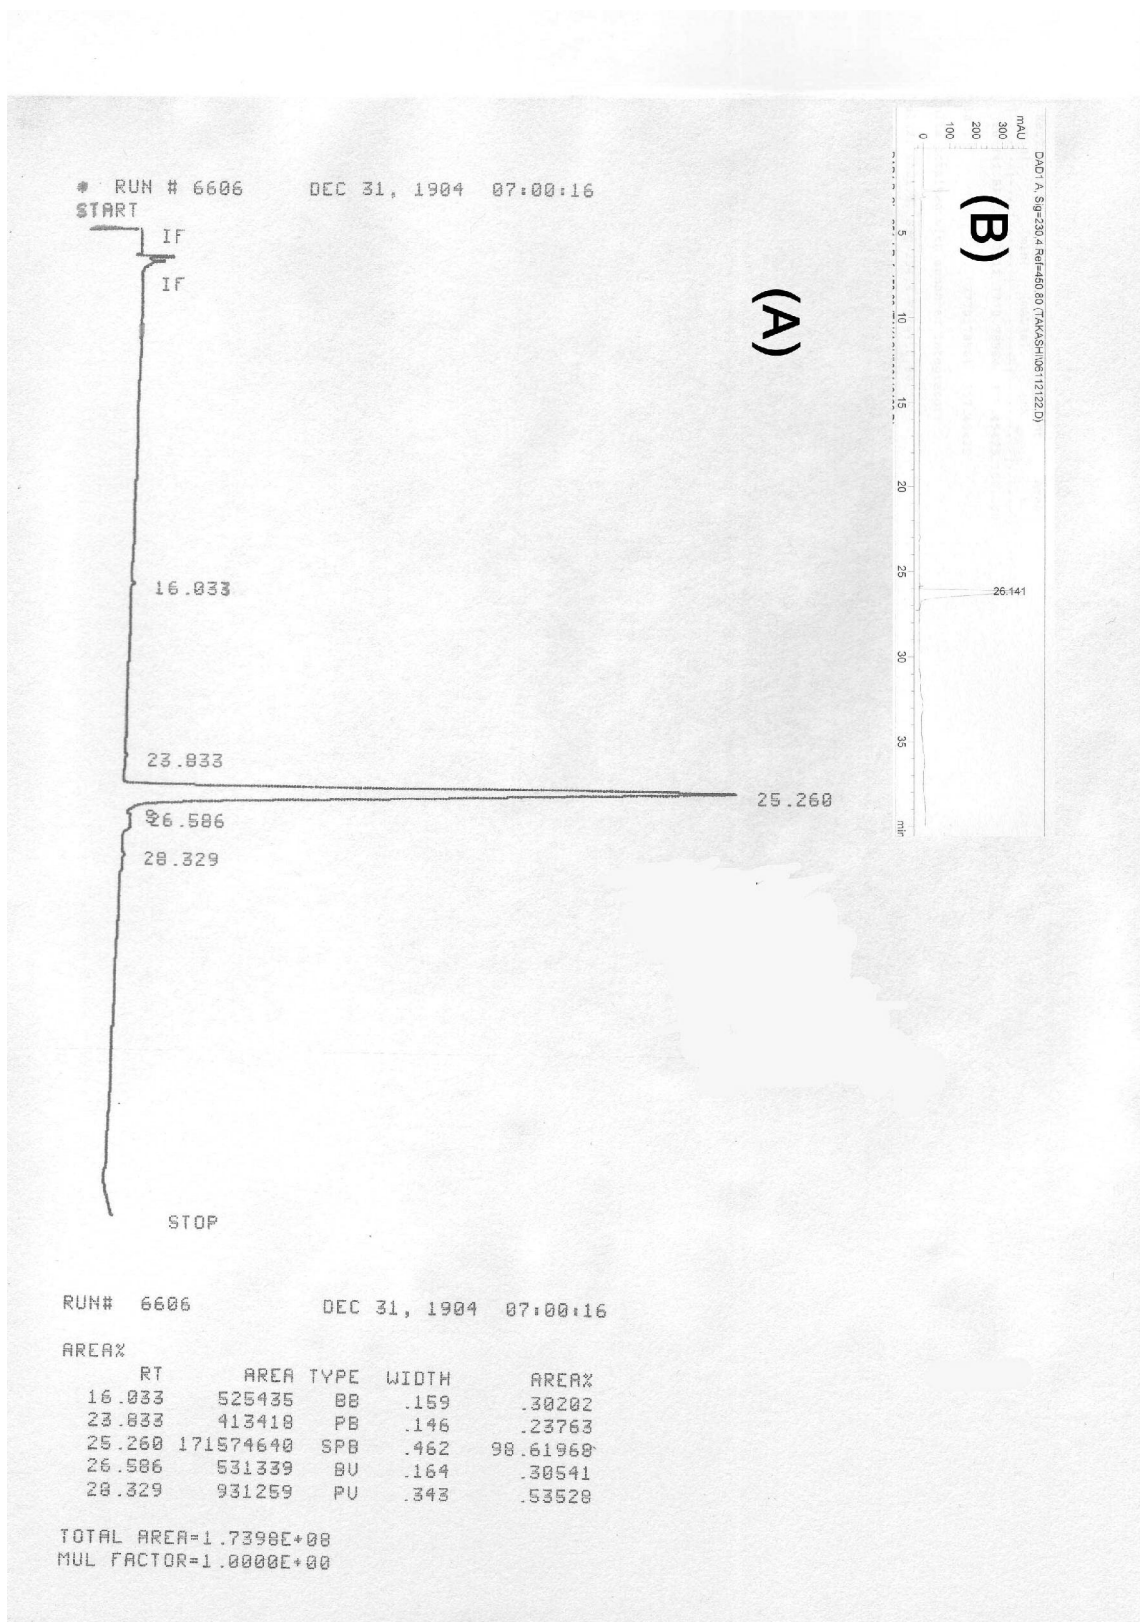

**Chart S1.** HPLC trace of 1: (A) 10-90% of acetonitrile containing 0.1% TFA within 40 min and up to 95% within an additional 5 min, 1 mL/min, 230 nm, Waters NOVA-Pak C-18 column (3.9 x 150 mm, 5  $\mu$ m, 60  $\text{\AA}$ ). (B) 30-70% acetonitrile containing 0.1% TFA within 40 min and up to 95% within an additional 5 min, 1 mL/min, 230 nm, Vydac 218TP104 C-18 column (4.6 x 250 mm, 10  $\mu$ m, 300  $\text{\AA}$ ).

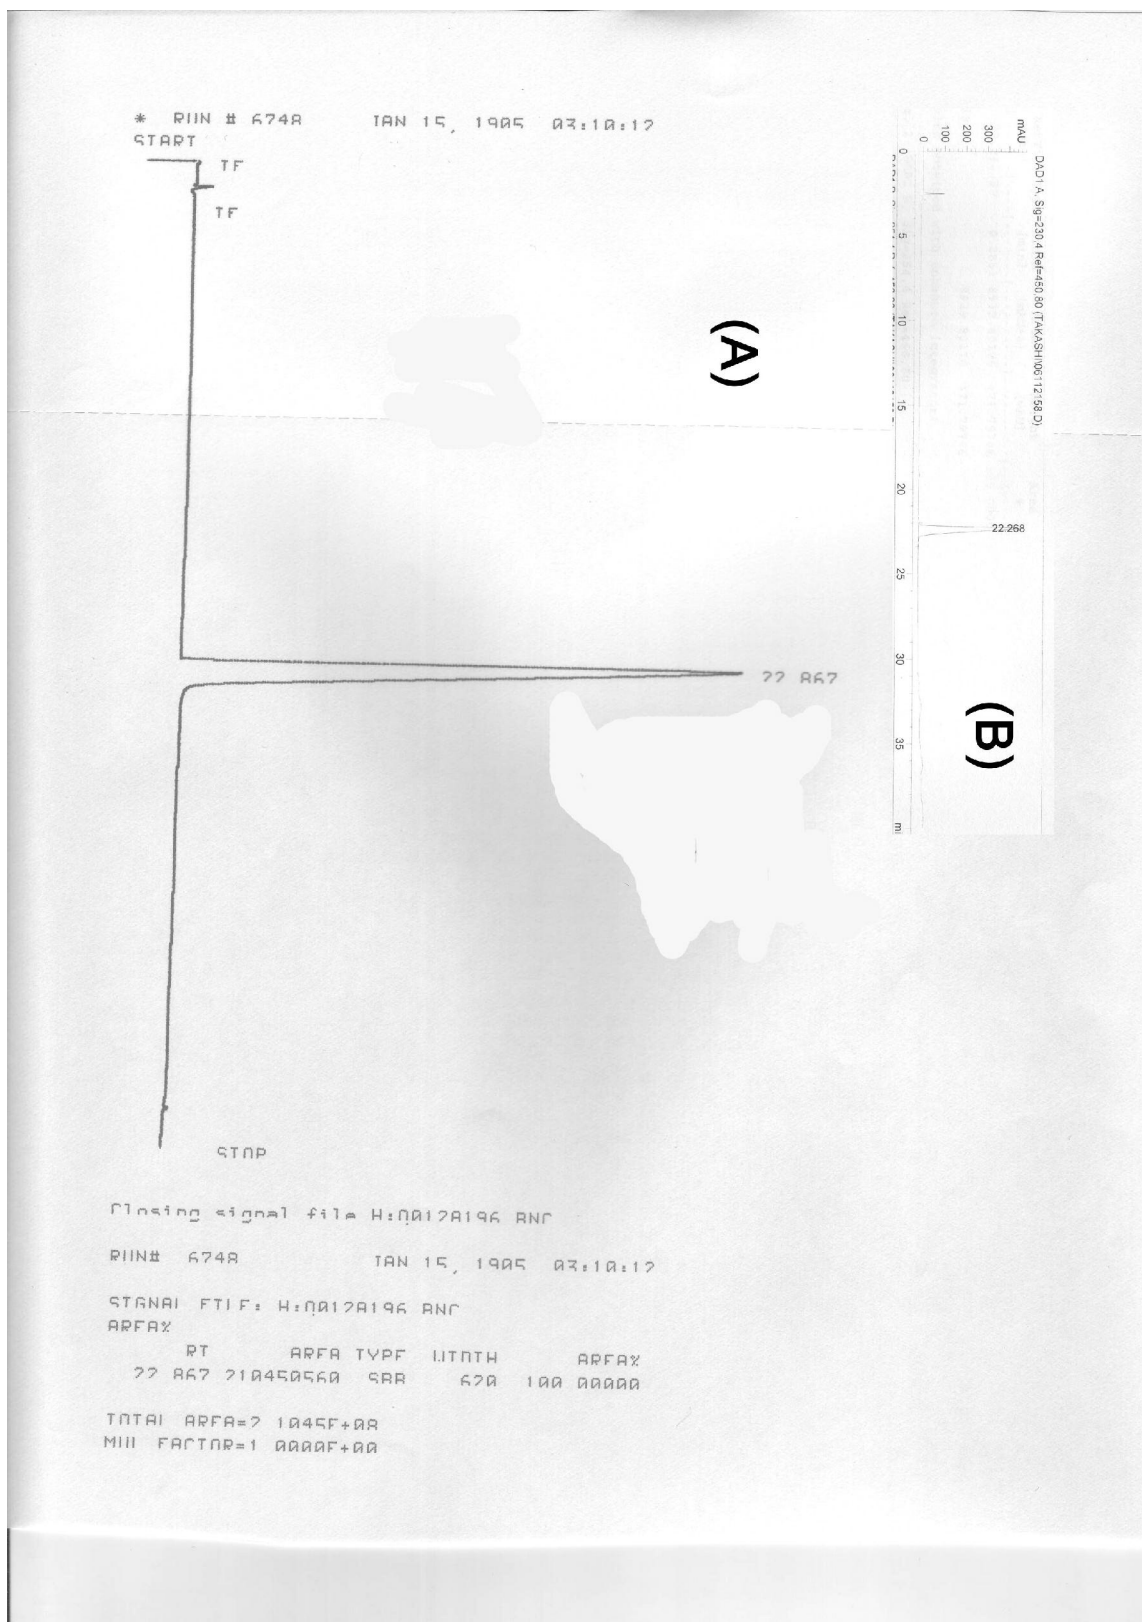

**Chart S2.** HPLC trace of **2**: (A) 10-90% of acetonitrile containing 0.1% TFA within 40 min and up to 95% within an additional 5 min, 1 mL/min, 230 nm, Waters NOVA-Pak C-18 column (3.9 x 150 mm, 5  $\mu$ m, 60  $\text{\AA}$ ). (B) 30-70% acetonitrile containing 0.1% TFA within 40 min and up to 95% within an additional 5 min, 1 mL/min, 230 nm, Vydac 218TP104 C-18 column (4.6 x 250 mm, 10  $\mu$ m, 300  $\text{\AA}$ ).

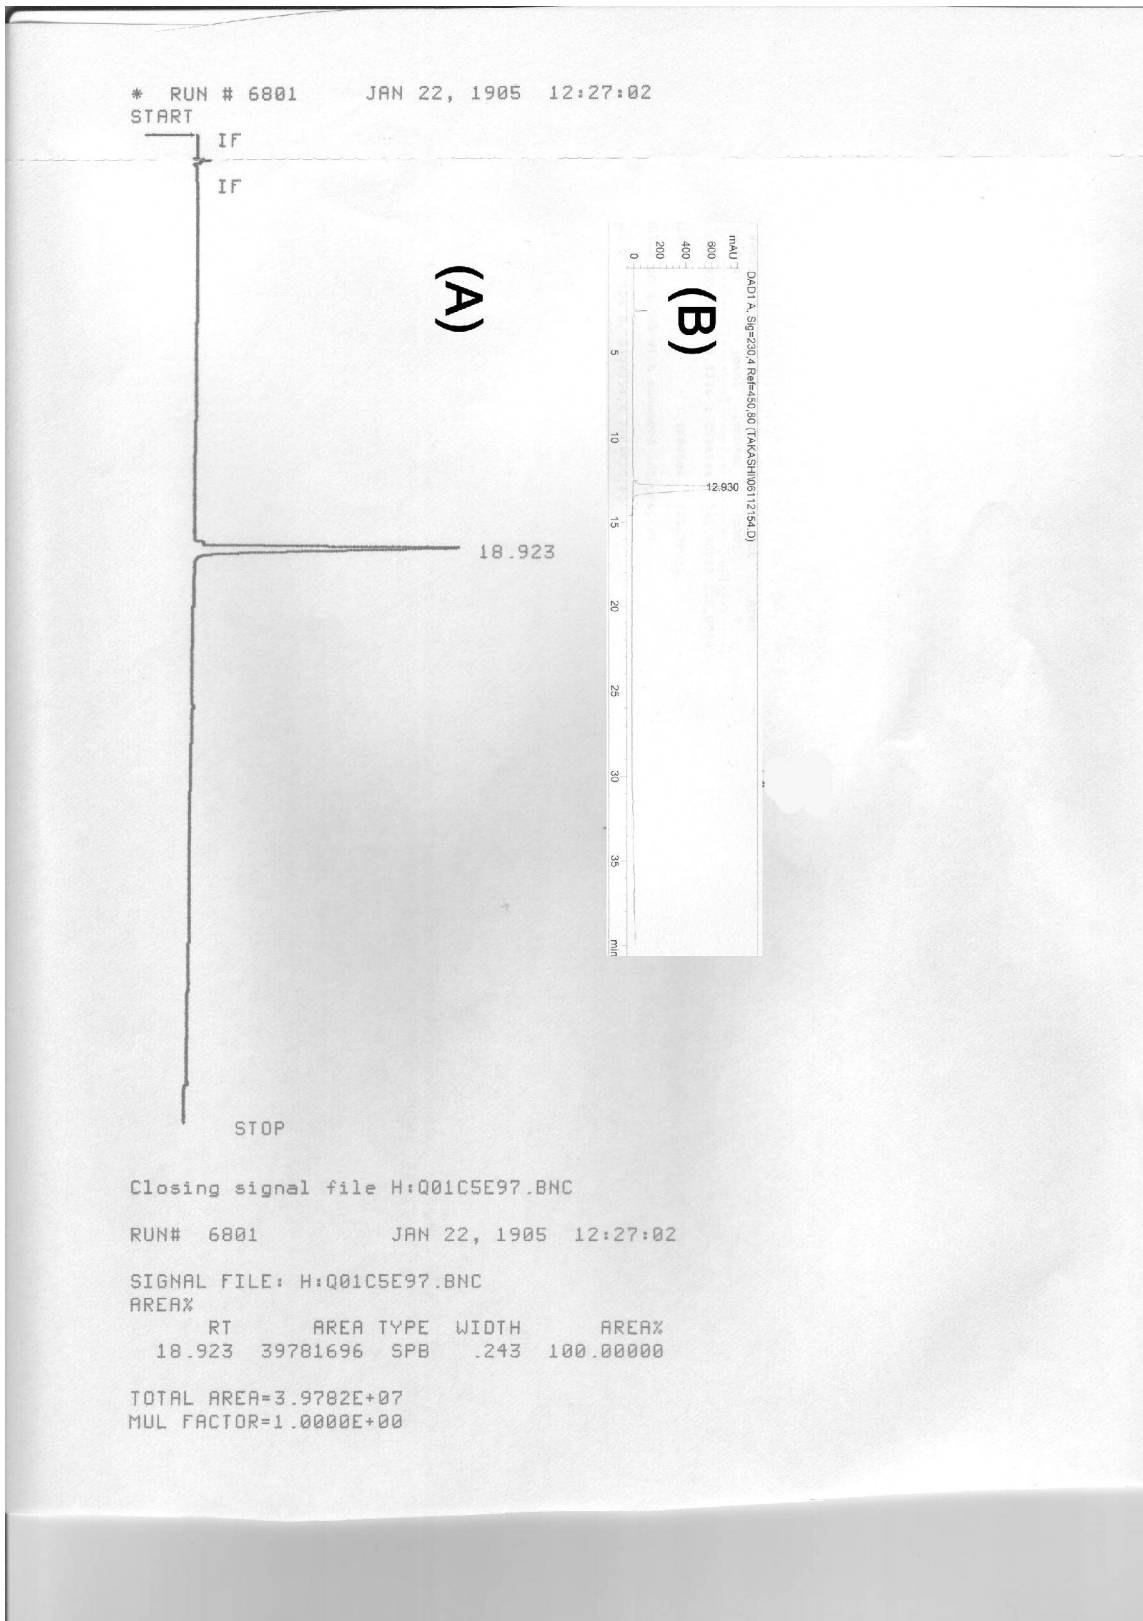

**Chart S3.** HPLC trace of **3**: (A) 10-90% of acetonitrile containing 0.1% TFA within 40 min and up to 95% within an additional 5 min, 1 mL/min, 230 nm, Waters NOVA-Pak C-18 column (3.9 x 150 mm, 5  $\mu$ m, 60  $\text{\AA}$ ). (B) 30-70% acetonitrile containing 0.1% TFA within 40 min and up to 95% within an additional 5 min, 1 mL/min, 230 nm, Vydac 218TP104 C-18 column (4.6 x 250 mm, 10  $\mu$ m, 300  $\text{\AA}$ ).
